# Supplementary material for: Pt/single-stranded DNA/graphene nanocomposite with improved catalytic activity and CO tolerance
Source: Royal Society of Chemistry journal article supplement (doi:10.1039/c5ta00891c), 2015-01-01
Supplement: c5ta00891c1.pdf [file c5ta00891c1.pdf]

## Pt/Single-stranded DNA/Graphene Nanocomposite with Improved Catalytic Activity and CO Tolerance

Mengzhu Li, Xiaoyu Guo, Yuxia Pan, Yinhua Liang, Yiping Wu, Ying Wen\* and Haifeng Yang\*

The Education Ministry Key Lab of Resource Chemistry Department of Chemistry Shanghai Normal University, Shanghai, 200234, P. R. China.

E-mail: hfyang@shnu.edu.cn (Haifeng. Yang); wenyong117@hotmail.com (Ying. Wen)

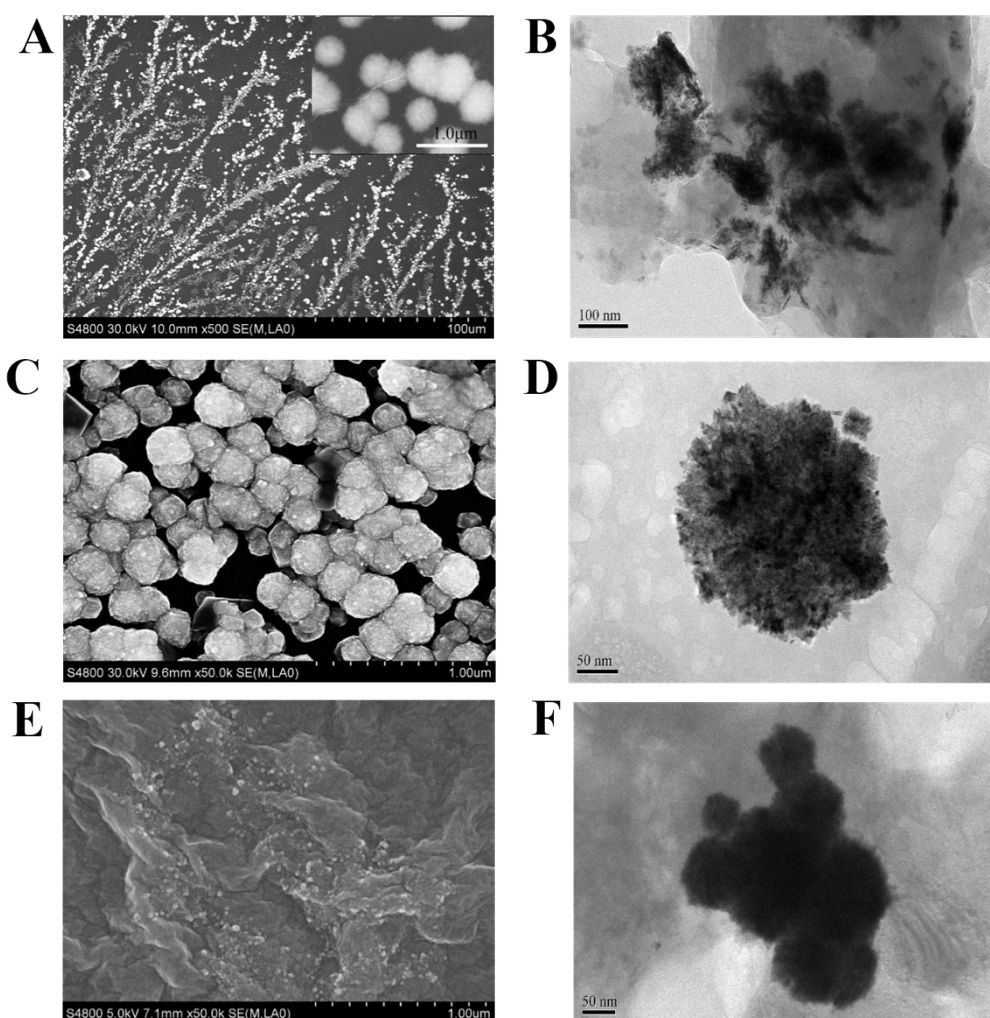

**Fig. S1** (A) SEM image of ssDNA-RGO/cf-Pt (scale, 100 μm), Inset: SEM image of ssDNA-RGO/cf-Pt (scale, 1 μm) (B) TEM image of ssDNA-RGO/cf-Pt (scale, 100 nm) (C) SEM image of GO/Pt (scale, 1.0 μm), (D) TEM image of GO/Pt (scale, 50 nm), (E) SEM image of RGO/Pt (scale, 1.0 μm), (F) TEM image of RGO/Pt (scale, 50 nm).

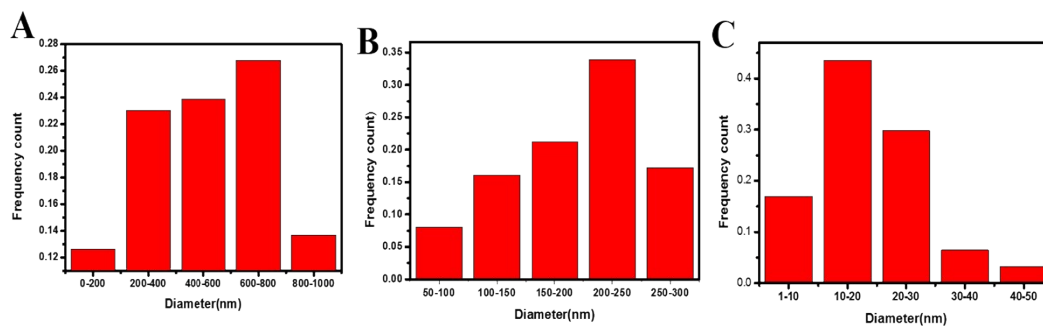

**Fig. S2** Size and size distribution (in diameter, nm) of (A)ssDNA-RGO/cf-Pt, (B) GO/ Pt, (V) RGO/ Pt

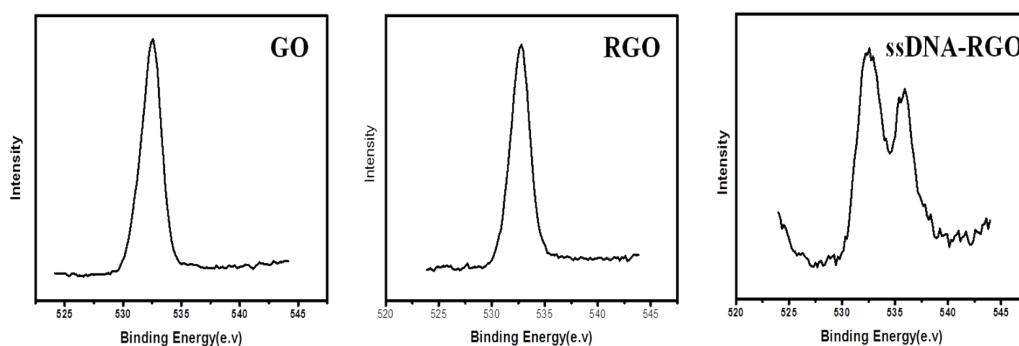

**Fig. S3** XPS spectra of (A) oxygen 1s of GO, (B) oxygen 1s of GO, (C) oxygen 1s of ssDNA-RGO/cf-Pt.

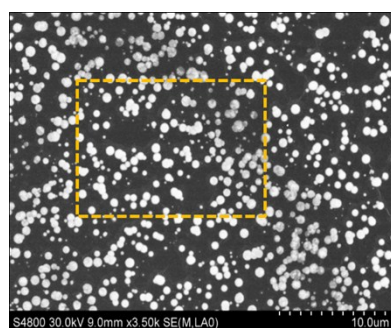

ElAN Series un. C norm. C Atom. C Error  
[wt.%] [wt.%] [at.%] [wt.%]

|                | un.    | C norm. | C Atom. | C Error |
|----------------|--------|---------|---------|---------|
|                | [wt.%] | [wt.%]  | [at.%]  | [wt.%]  |
| C 6 K-series   | 90.51  | 90.51   | 94.88   | 10.1    |
| N 7 K-series   | 3.43   | 3.43    | 3.08    | 0.9     |
| O 8 K-series   | 2.28   | 2.28    | 1.80    | 0.5     |
| Pt 78 M-series | 3.78   | 3.78    | 0.24    | 0.2     |
| P 15 K-series  | 0.00   | 0.00    | 0.00    | 0.0     |

Total: 100.00 100.00 100.00

**Fig. S4** (A) EDS image with the spectra area squared in yellow dotted line. (B) Atomic quantities from EDS spectra.
